# Supplementary material
Source: publisher site journal article supplement (https://www.dovepress.com/article/372735)
Supplement: Supplementary file 1 [file get_supplementary_file.php]

**Table S1. Clinical features in patients with pneumonia according to absence or presence of emphysema**

|  | Total (N=41) | No emphysema (n=4) | Emphysema (n=37) | P-value |
| --- | --- | --- | --- | --- |
| **Pneumonia type** |  |  |  | 0.489 |
| Typical pneumonia | 37 (90.2) | 4 (100) | 33 (89.2) |  |
| Atypical pneumonia | 4 (9.8) | 0 (0) | 4 (10.8) |  |
| **Severity of pneumonia** |  |  |  | 0.976 |
| Outpatient department | 31 (75.6) | 3 (75) | 28 (75.7) |  |
| Inpatient department | 10 (24.4) | 1 (25) | 9 (24.3) |  |
| **CURB score** |  |  |  | 0.634 |
| <2 | 34 (82.9) | 4 (100) | 30 (81.1) |  |
| 2≤ | 7 (17) | 0 (0) | 7 (18.9) |  |
| **CT pattern** |  |  |  |  |
| Consolidation | 15 (36.6) | 0 (0) | 15 (40.5) | 0.11 |
| Ground glass opacity | 18 (43.9) | 2 (50) | 16 (43.2) | 0.796 |
| Opacities | 5 (12.2) | 1 (25) | 4 (10.8) | 0.41 |
| Bronchopneumonia | 2 (4.9) | 0 (0) | 2 (5.4) | 0.634 |
| Nodular lesion | 9 (22) | 1 (25) | 8 (21.6) | 0.877 |
| Infiltration | 2 (4.9) | 0 (0) | 2 (5.4) | 0.634 |
| **CT involvement** |  |  |  |  |
| RUL | 12 (29.3) | 0 (0) | 12 (32.4) | 0.176 |
| RML | 13 (31.7) | 0 (0) | 13 (35.1) | 0.151 |
| RLL | 23 (56.1) | 2 (50) | 21 (56.8) | 0.796 |
| LUL | 22 (53.7) | 2 (50) | 20 (54) | 0.482 |
| LLL | 17 (41.5) | 2 (50.0) | 15 (40.5) | 0.715 |
| **Death** | 1 (2.4) | 0 (0) | 1 (2.7) | 0.739 |

**Note**: Data are presented as n (%) and median (SE)

**Abbreviations:** CURB-65, confusion, uremia, respiratory rate, BP, age ≥ 65 years;CT, computed tomography; RUL, right upper lobe; RML, right middle lobe; RLL, right lower lobe; LUL, left upper lobe; LLL, left lower lobe

**Figure S1. Flowchart of patient inclusion and exclusion**

**
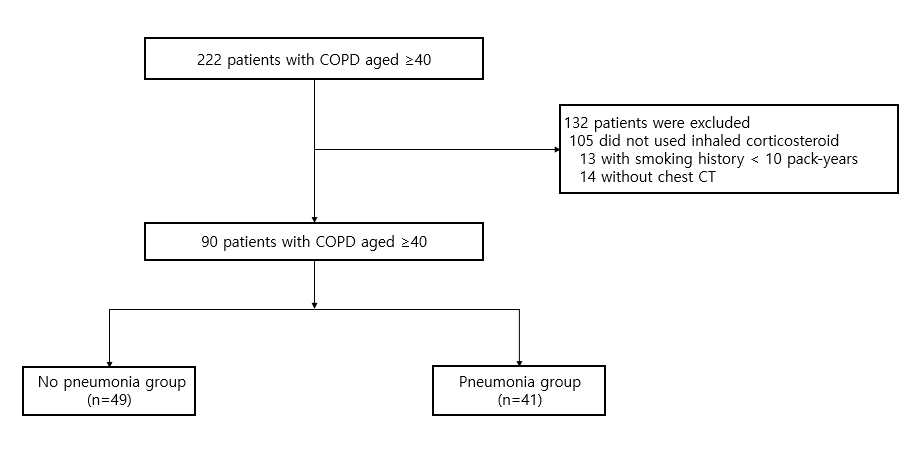
**

**Figure S2. Kaplan-Meier curves for the time to first pneumonia event according to the absence or presence of emphysema**


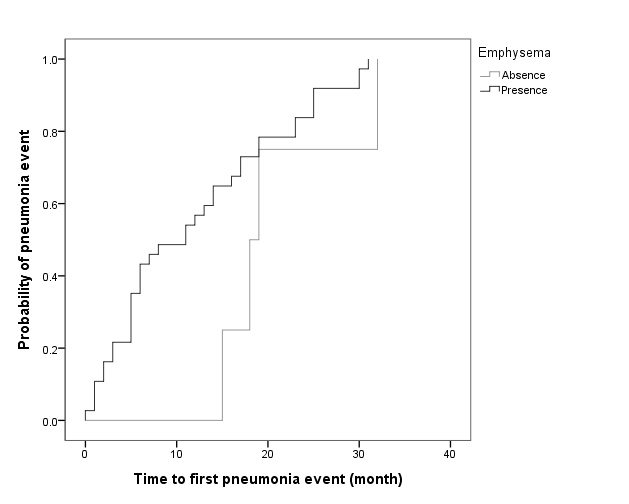


**Log rank P=0.103**

**Absence**

**Presence**
